# Supplementary material for: Co-delivery of camptothecin and curcumin by cationic polymeric nanoparticles for synergistic colon cancer combination chemotherapy
Source: Royal Society of Chemistry journal article supplement (doi:10.1039/c5tb01245g), 2015-01-01

## **Electronic Supplementary Information (ESI)**

### **Co-delivery of camptothecin and curcumin by cationic polymeric nanoparticles for synergistic colon cancer combination chemotherapy**

Bo Xiao<sup>a,b\*</sup>, Xiaoying Si<sup>a</sup>, Moon Kwon Han<sup>b</sup>, Emilie Viennois<sup>b,c</sup>, Mingzhen Zhang<sup>b</sup>, Didier Merlin<sup>b,c</sup>

<sup>a</sup>Institute for Clean Energy and Advanced Materials, Faculty for Materials and Energy, Southwest University, Chongqing, 400715, P. R. China

<sup>b</sup>Center for Diagnostics and Therapeutics, Institute for Biomedical Science, Georgia State University, Atlanta, 30302, USA

<sup>c</sup>Atlanta Veterans Affairs Medical Center, Decatur, 30033, USA

\*Author for correspondence

Tel.: +1 (404) 413 3597

Fax: +1 (404) 413 3580

Email: [bxiao@gsu.edu](mailto:bxiao@gsu.edu)

Supplementary Figure 1. UV-vis absorption and fluorescence spectra of free CPT and free CUR dissolved in DMSO.

**Supplementary Figure 1.**

Xiao B. et al.

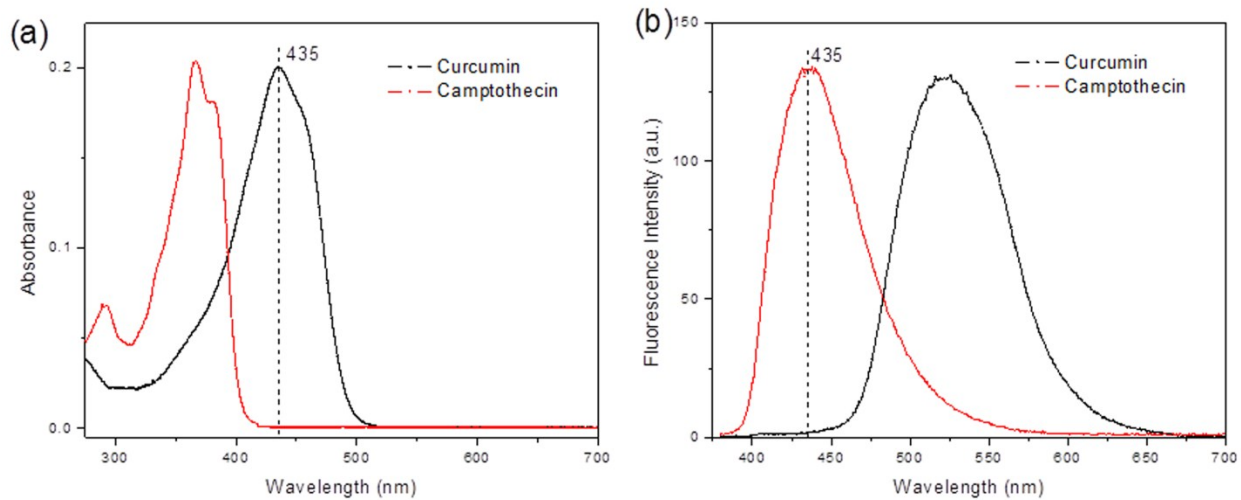

Supplement: c5tb01245g1.pdf [file c5tb01245g1.pdf]
